# Supplementary material
Source: MDPI journal article supplement (https://www.mdpi.com/2071-1050/13/15/8177)

**Figure S1. Monthly precipitation and air temperature of the research site for the period of 2017-2019.**

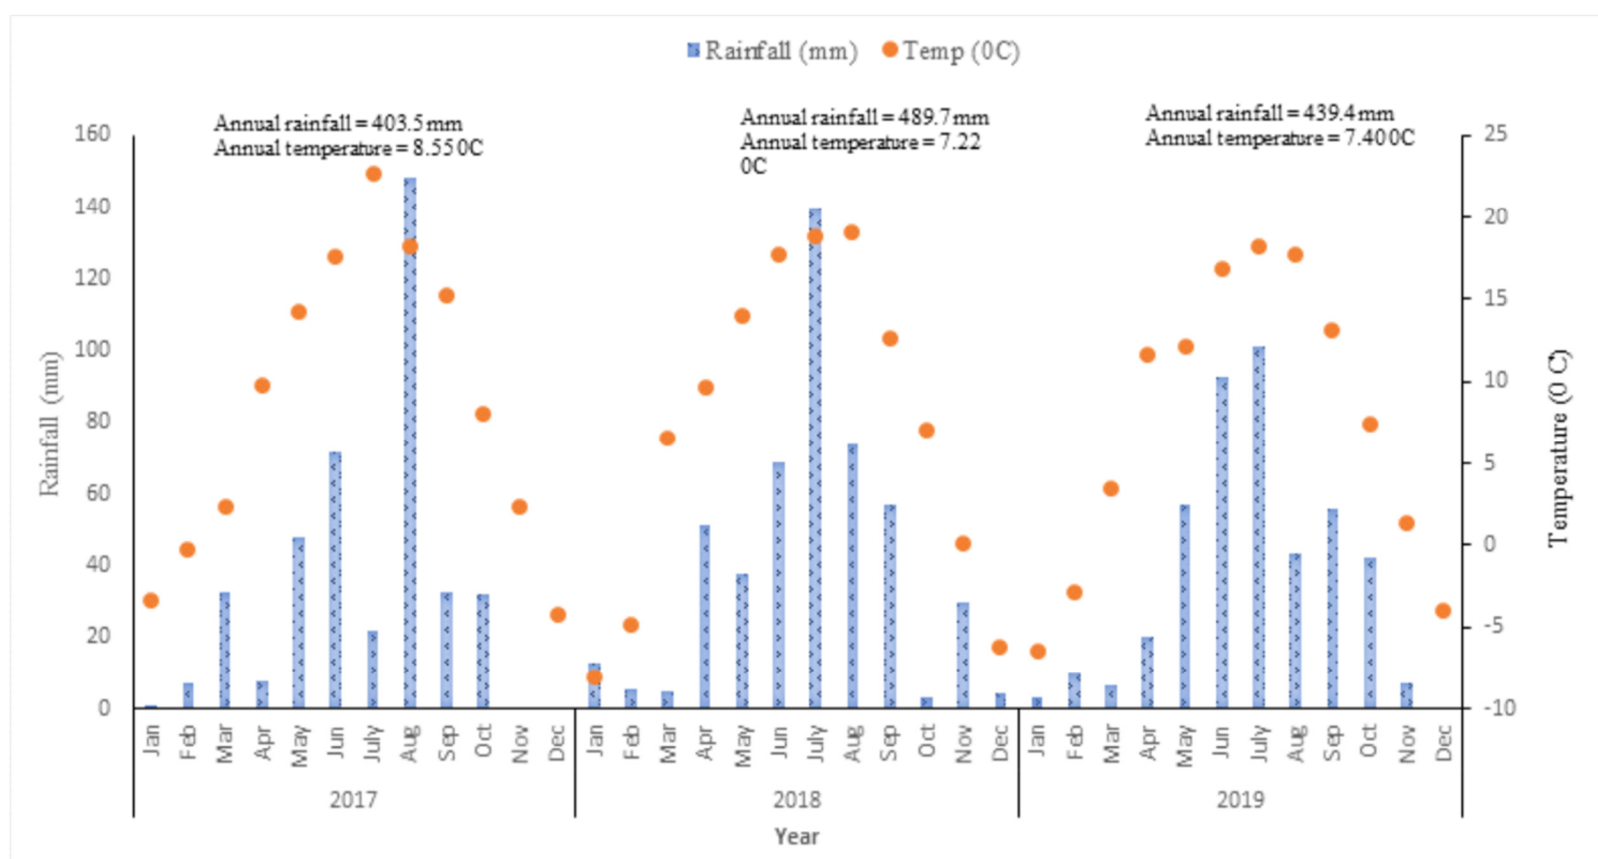

Supplement: s1 [file s1]
